# Supplementary material
Source: PubMed Central journal article supplement (PMC7276914)

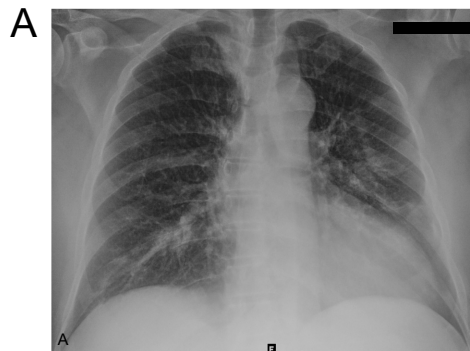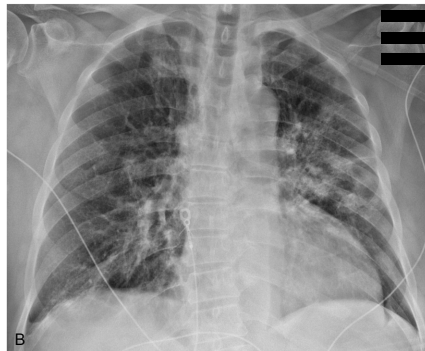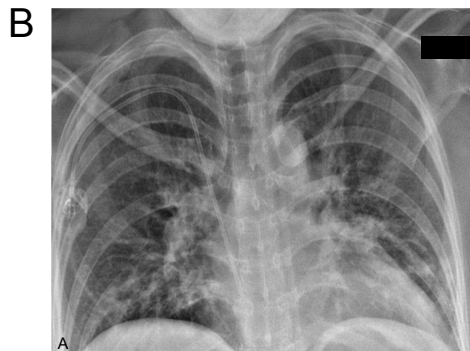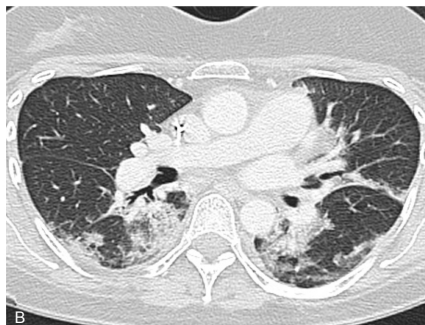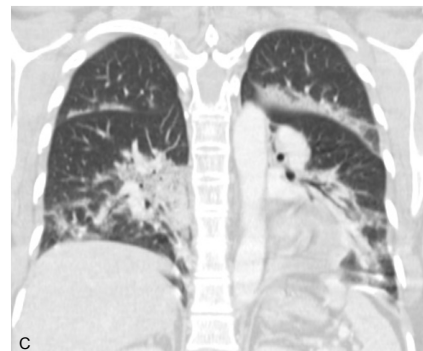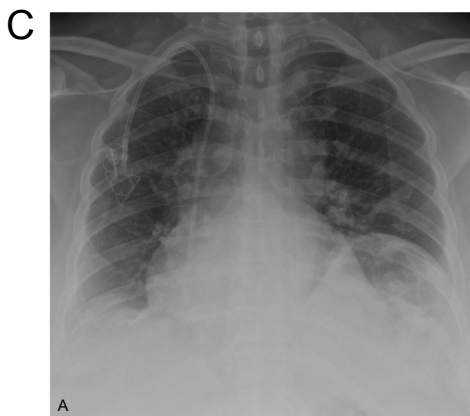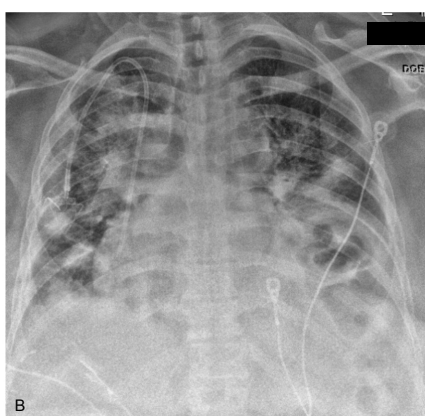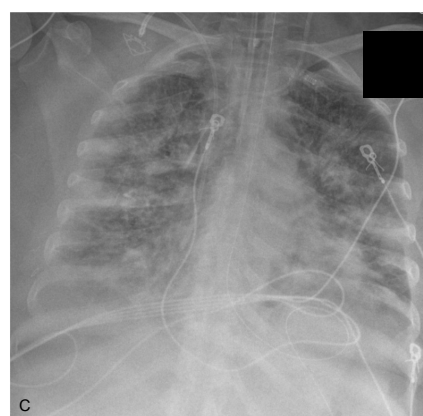

Supplement: AJH-95-E210-s001.pdf [file AJH-95-E210-s001.pdf]

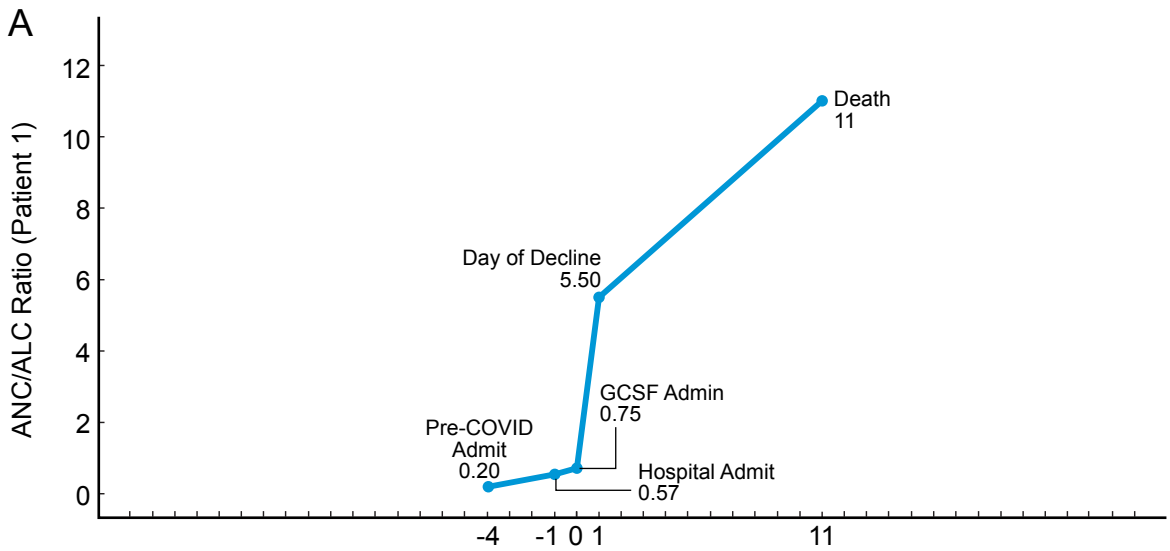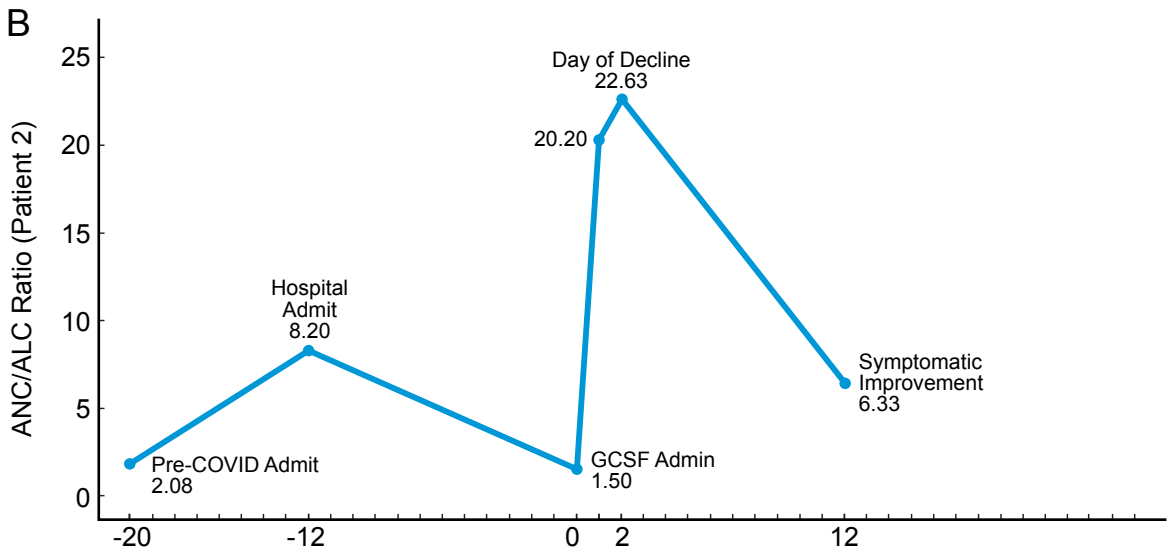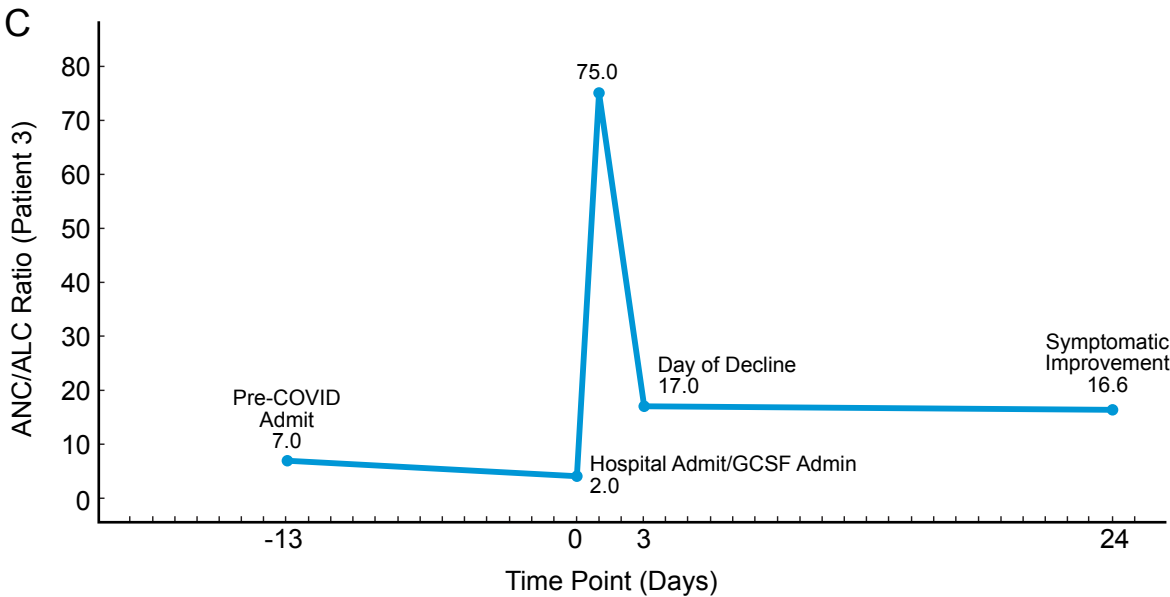

Supplement: AJH-95-E210-s002.pdf [file AJH-95-E210-s002.pdf]
